# Supplementary figures and images for: Why IEEE Xplore Matters for Research Trend Analysis in the Energy Sector
Source: Preprints.org preprint supplement (doi:10.20944/preprints202108.0197.v1), 2021-08-09

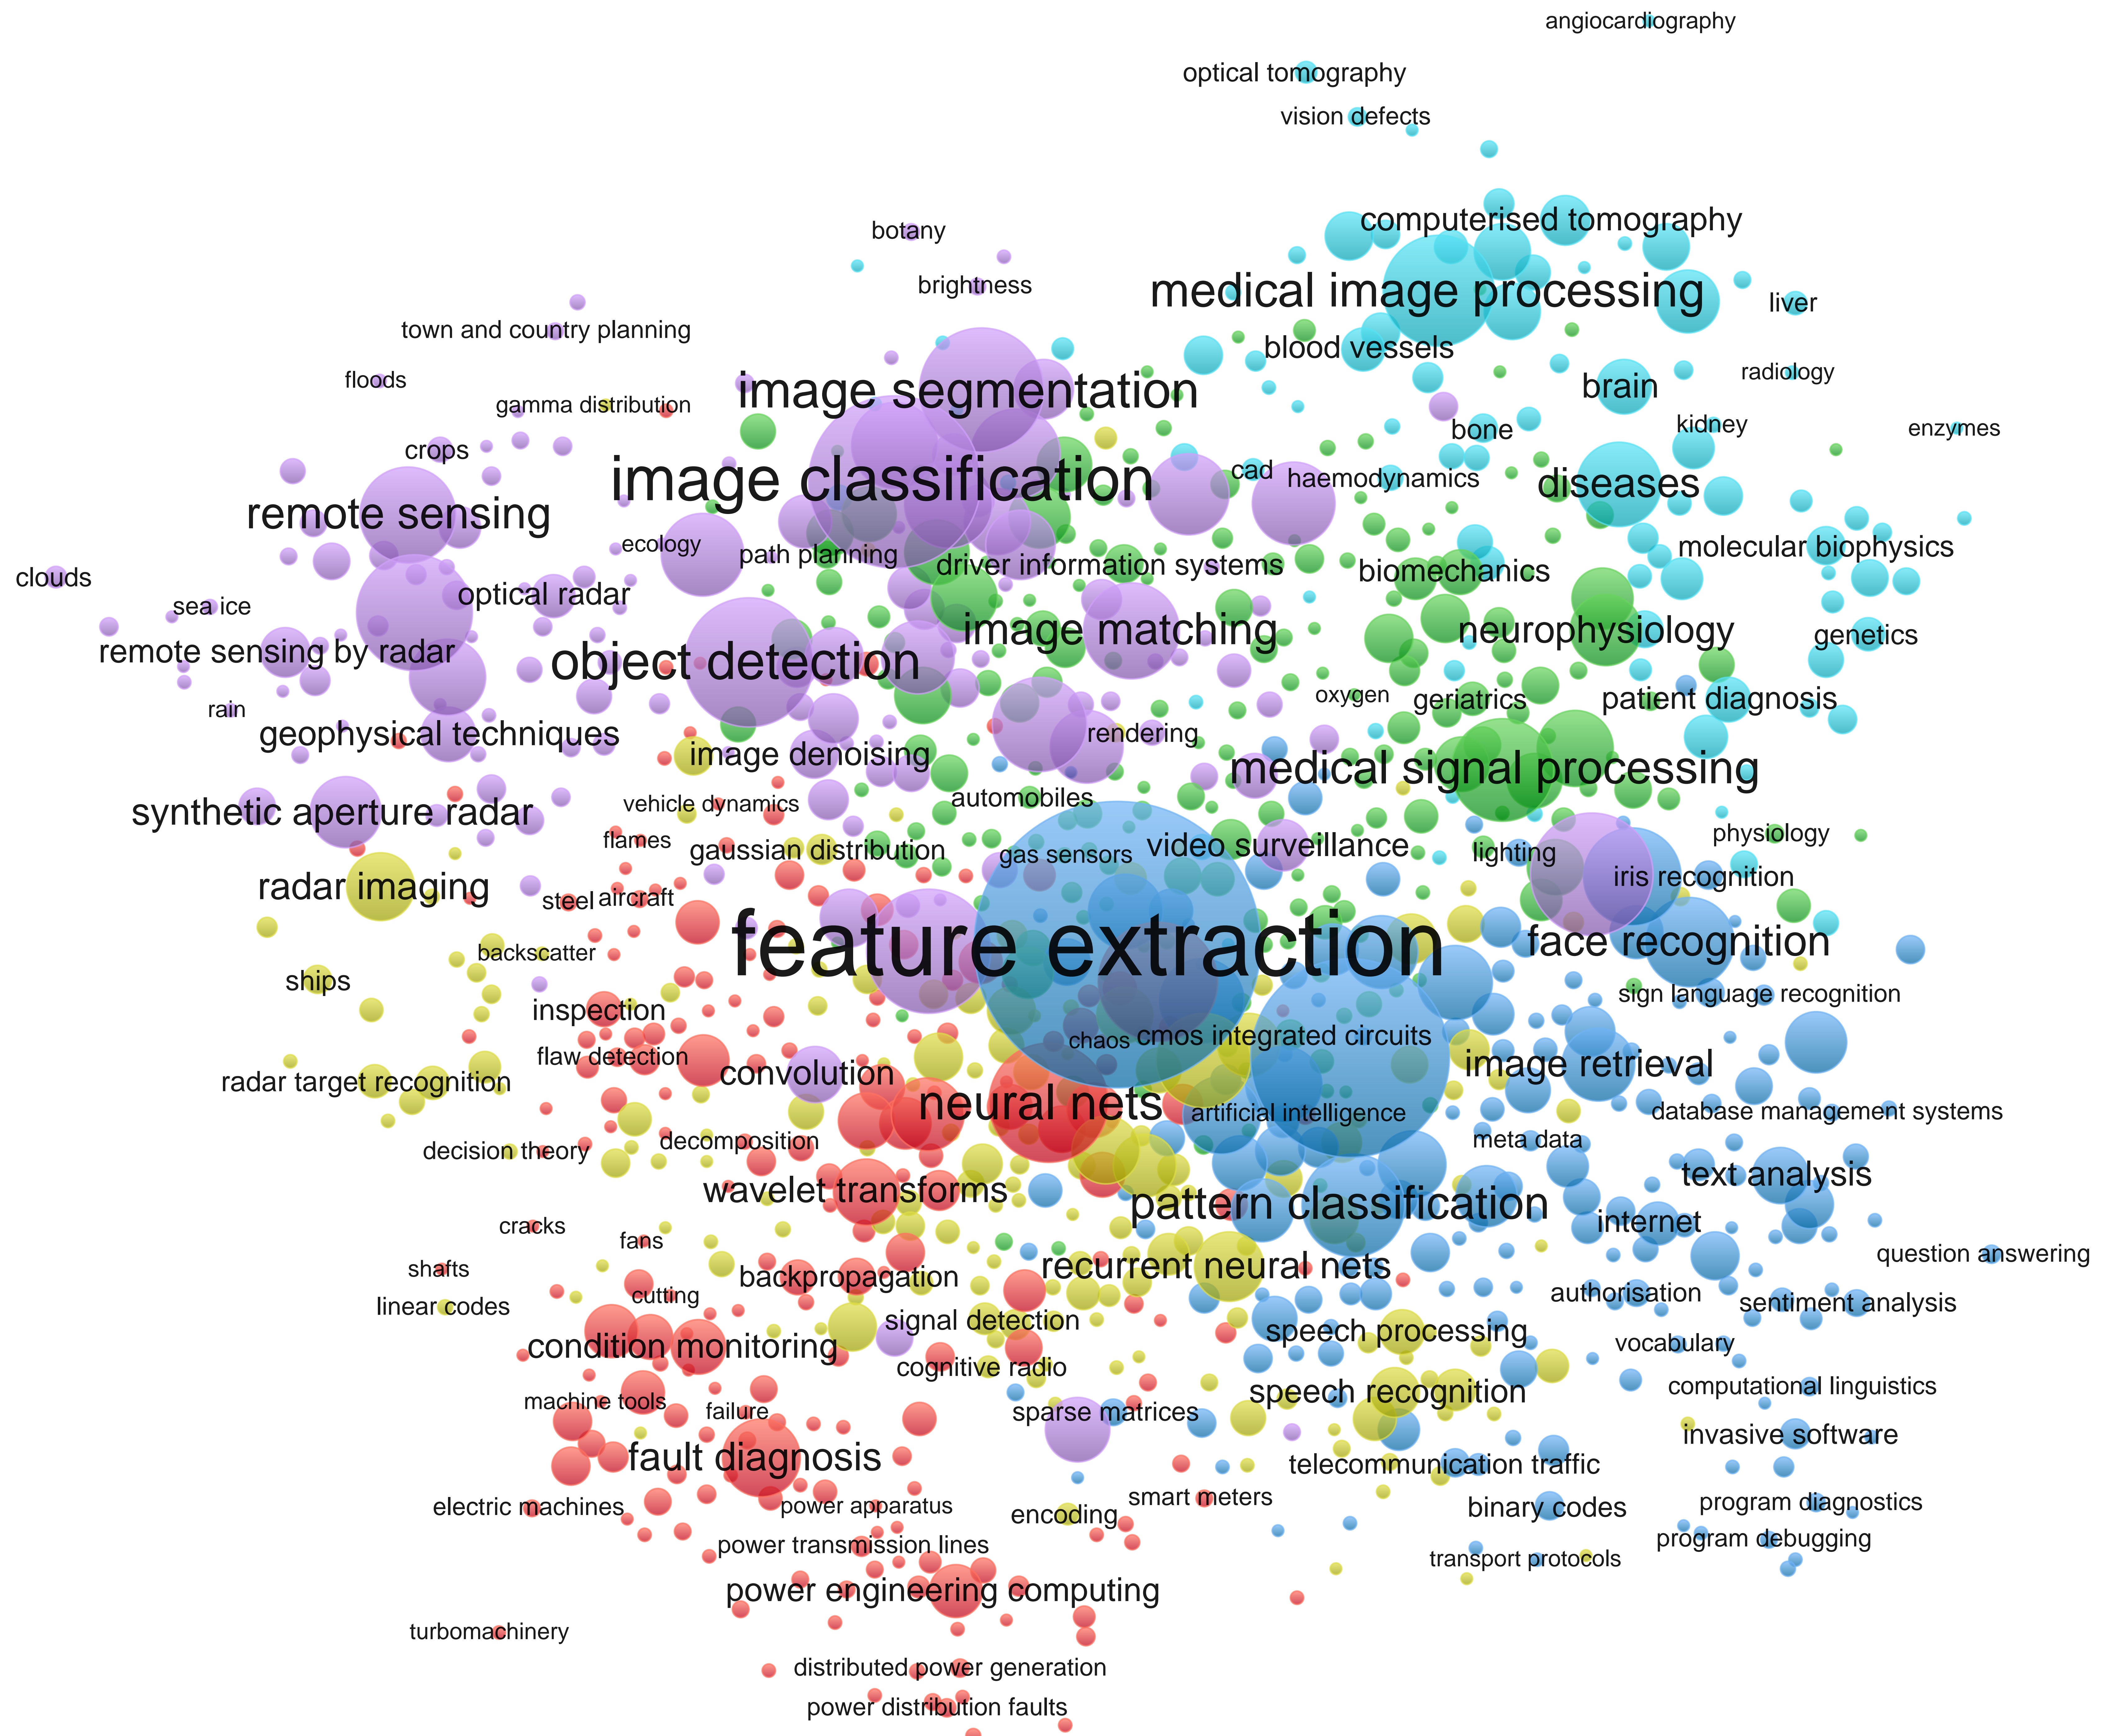



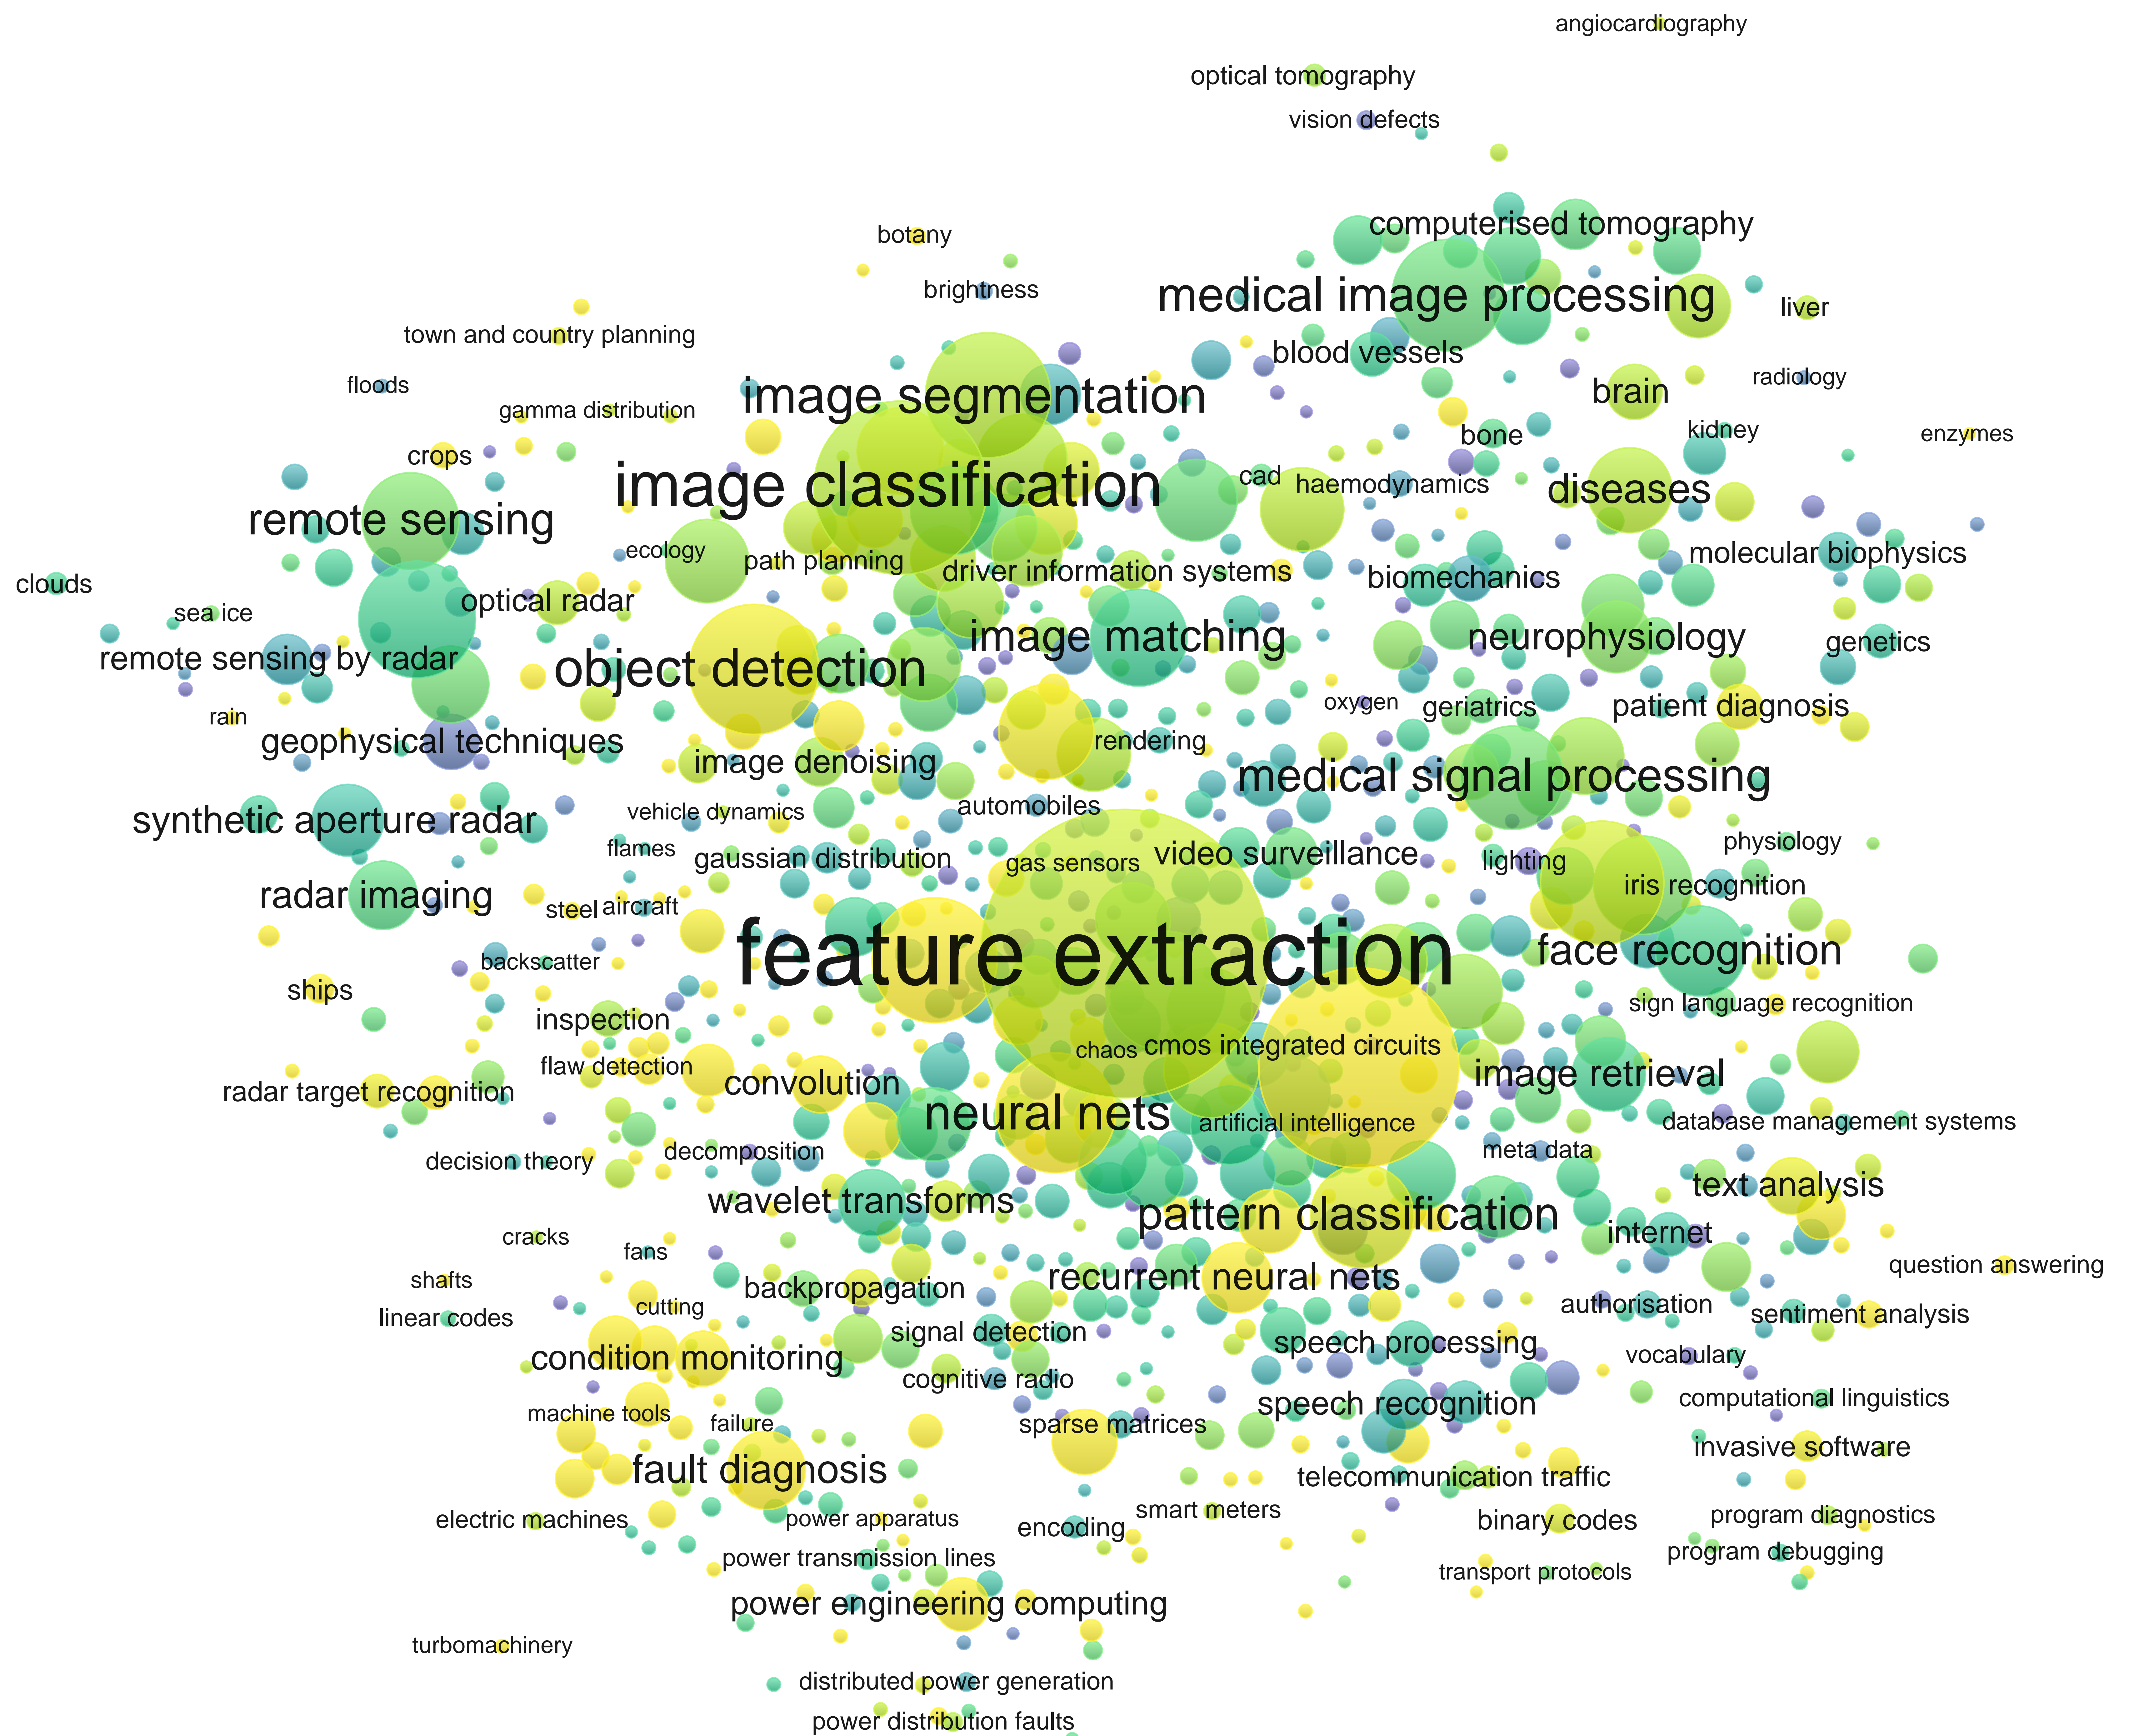

Supplement: Supplementary file 1 [file supplementary]
